# Supplementary material for: Contra-Friedel–Crafts tert-butylation of substituted aromatic rings via directed metallation and sulfinylation
Source: Royal Society of Chemistry journal article supplement (doi:10.1039/b600181e), 2006-01-01
Supplement: b600181e.pdf [file b600181e.pdf]

---

## Contra-Friedel-Crafts *tert*-butylation of substituted aromatic rings via directed metallation and sulfinylation

---

Jonathan Clayden,<sup>\*a</sup> Christopher C. Stimson<sup>ab</sup> and Martine Keenan<sup>b</sup>

<sup>a</sup> School of Chemistry, University of Manchester, Oxford Road, Manchester M13 9PL, UK; clayden@man.ac.uk

<sup>b</sup> Eli Lilly and Co. Ltd., Erl Wood Manor, Windlesham, Surrey GU20 6PH, UK

### ELECTRONIC SUPPLEMENTARY INFORMATION

**Details** of spectrometers etc. have been provided before.<sup>1</sup> “Flash Chromatography” refers to chromatography performed on silica by the method of Still *et al.*<sup>2</sup>

**Method A** *General ortholithiation procedure using *s*-BuLi.* —*sec*-BuLi (1.3 equiv, 1.3 mmol of a 1.3M solution in hexane) was added dropwise to the amide (1 equiv, 1.0 mmol) stirring in dry THF (20 ml) under nitrogen at  $-78$  °C. After 30 - 60 mins, the electrophile (2 equiv, 2.0 mmol) was added dropwise at  $-78$  °C and the mixture left to warm to room temperature and quenched with saturated ammonium chloride solution. The THF was removed under reduced pressure and the mixture diluted with dichloromethane (50 ml), washed with saturated ammonium chloride solution (3 x 20 ml), dried (MgSO<sub>4</sub>) and concentrated under reduced pressure.

**Method B** *General procedure for substitution of *tert*-butyl sulfoxides.* —*tert*-BuLi (5 equiv, 5.0 mmol of a 1.5M solution in pentane) was added dropwise to the *tert*-butyl sulfoxide (1 equiv, 1.0 mmol) at  $-78$  °C. After 20-90 minutes, saturated ammonium chloride solution was added to quench and the mixture allowed to warm to room temperature. The mixture diluted with diethyl ether (30 ml), washed with saturated ammonium chloride solution (3 x 20 ml), dried (MgSO<sub>4</sub>) and concentrated under reduced pressure.

*tert*-Butyl *tert*-butylthiosulfinate.<sup>3</sup> —By the method of Ellman, *tert*-Butyl disulfide (20 ml, 0.105 mol) was stirred in acetone (46 ml) and the chiral salen ligand<sup>3</sup> (200 mg, 0.55 mmol) and vanadyl acetylacetonate (140 mg, 0.55 mmol) were added. Hydrogen peroxide (14.4 ml of a 27.5% wt. soln in water) was added over eight hours at 0 °C, the mixture turning from green to black. After 18 hours the solution was diluted with ether (30 ml) and washed with saturated ammonium chloride solution (3 x 15 ml), dried (MgSO<sub>4</sub>) and solvents evaporated under reduced

# Supplementary Material (ESI) for Chemical Communications

# This journal is (c) The Royal Society of Chemistry 2006

pressure giving a yellow liquid. Hexane (20 ml) was added and the solution was left to crystallise for three hours at 4 °C. The mother liquor was filtered, concentrated under reduced pressure and rediluted in hexane (15 ml) and left to recrystallise. The process was repeated three times giving the thiosulfinate (12.7 g, 68%) as white prisms, m.p. <21 °C, 94% ee by HPLC ((*R,R*)-Whelk 01),  $R_f$  (70:30 Petrol:EtOAc) 0.46;  $\delta_H$ (400 MHz; CDCl<sub>3</sub>) 1.38 (9H, s, CH<sub>3</sub>), 1.56 (9H, s, CH<sub>3</sub>).

**Starting materials 1 and 4** were obtained from commercial sources or made by standard methods:

*4,5-Dihydro-4,4-dimethyl-2-phenyloxazole 1a*.<sup>4</sup> —2-Methyl-2-amino-1-propanol (14.6 ml, 0.152 mol) was added to benzoyl chloride (8.0 ml, 69.0 mmol) in dichloromethane (125 ml) at 0 °C and the mixture was stirred at room temperature for 18 hours. The mixture was filtered, the cake washed with dichloromethane (30 ml) and cooled to 0 °C. Thionyl chloride (15.1 ml, 0.207 mol) was added and the mixture heated to reflux and then cooled to room temperature and stirred for 3 hours. Water and 40% aq. NaOH were added slowly until the solution reached pH 11 and the organic layer was separated, washed with saturated ammonium chloride solution (2 x 50 ml), dried (MgSO<sub>4</sub>) and concentrated under reduced pressure. The resulting oil was purified by flash chromatography (SiO<sub>2</sub>; Petrol:EtOAc 80:20) to give the oxazoline **1a** as a yellow oil (12.2 g, 100%);  $R_f$  (80:20 Petrol:EtOAc) 0.45;  $\delta_H$ (500 MHz; CDCl<sub>3</sub>) 1.21 (6H, s, CH<sub>3</sub>), 3.94 (2H, s, CH<sub>2</sub>), 7.21 (2H, t, *J* 8, ArH), 7.38 (1H, t, *J* 8, ArH), 7.76 (2H, d, *J* 8, ArH).

*N,N-Diethylbenzamide 1b*.<sup>5</sup> —Benzoyl chloride (5 ml, 43 mmol) was added dropwise to a solution of diethylamine (13.2 ml, 128 mmol) in dichloromethane (75 ml) at 0 °C. The mixture was raised to room temperature and left to stir for 18 hours. The mixture was washed with 1M aq. HCl (30 ml) then saturated ammonium chloride solution (2 x 20 ml), dried (MgSO<sub>4</sub>) and concentrated under reduced pressure giving the amide **1b** as a brown oil (7.0 g, 92%);  $R_f$  (70:30 Petrol:EtOAc) 0.39;  $\delta_H$ (500 MHz; CDCl<sub>3</sub>) 0.89 (3H, m (broad), CH<sub>3</sub>), 1.04 (3H, m (broad), CH<sub>3</sub>), 3.04 (2H, s (broad), NCH<sub>2</sub>), 3.33 (2H, s (broad), NCH<sub>2</sub>), 7.12-7.21 (5H, m, ArH).

*N,N-Diisopropylbenzamide 1c*.<sup>6</sup> —Benzoyl chloride (5.0 ml, 43 mmol) was added dropwise to a solution of diisopropylamine (19.0 ml, 128 mmol) in dichloromethane (75 ml) at 0 °C. The

# Supplementary Material (ESI) for Chemical Communications

# This journal is (c) The Royal Society of Chemistry 2006

mixture was raised to room temperature and left to stir for 18 hours. The mixture was washed with 1M aq. HCl (30 ml) then saturated ammonium chloride solution (2 x 20 ml), dried (MgSO<sub>4</sub>) and concentrated under reduced pressure giving the amide **1c** (9.0 g, 100%) as white crystals, m.p. 72-74 °C (Lit,<sup>7</sup> 69-72 °C); R<sub>f</sub> (70:30 Petrol:EtOAc) 0.50; δ<sub>H</sub>(500 MHz; CDCl<sub>3</sub>) 1.03 (3H, m (broad), CH<sub>3</sub>), 1.20 (3H, m (broad), CH<sub>3</sub>), 3.41 (1H, m (broad), NCH), 3.72 (1H, m (broad), NCH), 7.16-7.19 (2H, m, ArH), 7.23-7.26 (3H, m, ArH).

*N-tert-Butyl-N-methylbenzamide 1d*.<sup>8</sup> —*N*-Methyl-*tert*-butylamine (5.2 ml, 43.2 mmol) was added dropwise to a stirred solution of benzoyl chloride (5.0 ml, 43.2 mmol) and triethylamine (11.9 ml, 86.4 mmol) in anhydrous dichloromethane (125 ml) under nitrogen at 0 °C. The mixture was stirred at room temperature for 18 hours before washing with 1M aq. HCl (2 x 50 ml) and saturated ammonium chloride (50 ml) and dried (MgSO<sub>4</sub>). The solvents were evaporated under reduced pressure and the residue was recrystallised (heptane) to give the amide **1d** (6.96 g, 86% yield) as white plates, m.p. 79-80 °C (Lit,<sup>8</sup> 80-81 °C); R<sub>f</sub> (70:30 Petrol:EtOAc) 0.77; δ<sub>H</sub>(300 MHz; CDCl<sub>3</sub>) 1.52 (9H, s, <sup>t</sup>Bu), 2.88 (3H, s, NMe), 7.35-7.50 (5H, m, ArH).

*N-Isopropylbenzamide 1f*.<sup>9</sup> —Benzoyl chloride (5 ml, 43 mmol) was slowly added to a solution of isopropylamine (11.0 ml, 130 mmol) in dichloromethane (100 ml) at 0 °C. After stirring for 3 hours the mixture washed with saturated ammonium chloride solution (3 x 30 ml) and solvent removed under reduced pressure. The residue was recrystallised (Heptane/EtOAc) to give the amide **1f** (6.8 g, 95%) as white crystals, m.p. 100-102 °C (Lit,<sup>9</sup> 104-105 °C); R<sub>f</sub> (70:30 EtOAc) 0.50; δ<sub>H</sub>(500 MHz; CDCl<sub>3</sub>) 1.13 (6H, d, *J* 7, CH<sub>3</sub>), 4.15 (1H, sept, *J* 7, NCH), 5.85 (1H, s (broad), NH), 7.26-7.29 (2H, m, ArH), 7.32 (1H, m, ArH), 7.60-7.62 (2H, m, ArH).

*N,N-Diisopropyl-2-methoxybenzamide 4a*.<sup>6</sup> —Diisopropylamine (11.3 ml, 80 mmol) was added dropwise to a stirred solution of 1-anisoyl chloride (3 ml, 20 mmol) in anhydrous dichloromethane (85 ml) under nitrogen at 0 °C. After several hours the colourless mixture was washed with 1% aq. HCl (3 x 50 ml), dried (MgSO<sub>4</sub>) and solvents evaporated under reduced pressure and the residue was recrystallised (Heptane/EtOAc) to give the amide **4a** (5.59 g, 98%) as white crystals, m.p. 87-89 °C (Lit.,<sup>6</sup> 89-90 °C); R<sub>f</sub> (80:20 Petrol:EtOAc) 0.56; δ<sub>H</sub>(300 MHz; CDCl<sub>3</sub>) 1.07 (3H, d, *J* 7, CH<sub>3</sub>), 1.18 (3H, d, *J* 7, CH<sub>3</sub>), 1.58 (3H, d, *J* 7, CH<sub>3</sub>), 1.59 (3H, d, *J* 7,

# Supplementary Material (ESI) for Chemical Communications

# This journal is (c) The Royal Society of Chemistry 2006

CH<sub>3</sub>), 3.52 (1H, sept, *J* 7, CH), 3.71 (1H, sept, *J* 7, CH), 3.85 (3H, s, OMe), 6.91 (1H, d, *J* 8, ArH), 6.99 (1H, tt, *J* 8 and 1, ArH), 7.18 (1H, m, ArH), 7.33 (1H, m, ArH).

*N,N*-Diisopropyl-3-methoxybenzamide **4b**.<sup>10</sup> —Diisopropylamine (3.4 ml, 24.2 mmol) was added dropwise to a stirred solution of 3-methoxy benzoylchloride (3.0 ml, 21.9 mmol) and triethylamine (9.2 ml, 69.8 mmol) in anhydrous dichloromethane (50 ml) under nitrogen at 0 °C. The mixture was heated to 50 °C for 18 hours before cooling, washing with 1M aq. HCl (2 x 30 ml) and saturated ammonium chloride (30 ml) and drying (MgSO<sub>4</sub>). The solvents were evaporated under reduced pressure to give a residue which was recrystallised (heptane) to give the amide **4b** (4.2 g, 81%) as white crystals; *R*<sub>f</sub>(70:30 Petrol:EtOAc) 0.64; δ<sub>H</sub>(300 MHz; CDCl<sub>3</sub>) 1.00-1.40 (6H, m (broad), CH<sub>3</sub>), 1.40-1.70 (6H, m (broad), CH<sub>3</sub>), 3.60 (1H, m (broad), NCH), 3.79 (1H, m (broad), NCH), 3.82 (3H, s, OMe), 6.82-6.95 (3H, m, ArH), 7.33 (1H, t, *J* 8, ArH).

*N,N*-Diisopropyl-4-methoxybenzamide **4c**.<sup>6</sup> —Diisopropylamine (3.0 ml, 23.8 mmol) was added dropwise to a stirred solution of 4-methoxy benzoylchloride (3.0 ml, 21.7 mmol) and triethylamine (9.2 ml, 69.8 mmol) in anhydrous dichloromethane (50 ml) under nitrogen at 0 °C. The mixture was heated to 50 °C for 18 hours before cooling, washing with 1M aq. HCl (2 x 30 ml) and saturated ammonium chloride (30 ml). The solvents were evaporated under reduced pressure to give a residue which was purified by flash chromatography (SiO<sub>2</sub>; Petrol:EtOAc 80:20) to give the amide **4c** (5.13 g, 100%) as a colourless oil; *R*<sub>f</sub>(70:30 Petrol:EtOAc) 0.55; δ<sub>H</sub>(300 MHz; CDCl<sub>3</sub>) 1.20-1.50 (12H, m (broad), CH<sub>3</sub>), 3.60-3.90 (2H, m (broad), NCH), 3.85 (3H, s, OMe), 6.95 (2H, d, *J* 8, ArH), 7.35 (2H, d, *J* 8, ArH).

*Naphthalene-1-carboxylic acid diisopropylamide* **4d**.<sup>11</sup> —Diisopropylamine (11.2 ml, 80 mmol) was added dropwise to a stirred solution of naphthoyl chloride (3 ml, 20 mmol) in anhydrous dichloromethane (85 ml) under nitrogen at 0 °C. After several hours the mixture was washed with 1% aq. HCl (3 x 50 ml), dried (MgSO<sub>4</sub>) and concentrated under reduced pressure and the residue was recrystallised (Heptane/EtOAc) to give the amide **4d** (5.65 g, 97%) as white crystals, m.p.=175-178 °C (Lit.,<sup>11</sup> 181-182 °C); *R*<sub>f</sub>(80:20 Petrol:EtOAc) 0.72; δ<sub>H</sub>(300 MHz; CDCl<sub>3</sub>) 1.07 (3H, d, *J* 7, CH<sub>3</sub>), 1.12 (3H, d, *J* 7, CH<sub>3</sub>), 1.70 (3H, d, *J* 8, CH<sub>3</sub>), 1.77 (3H, d, *J* 7, CH<sub>3</sub>), 3.61 (1H, sept, *J* 7, CH), 3.66 (1H, sept, *J* 7, CH), 7.36 (1H, dd, *J* 6 and 1, ArH), 7.51 (3H, m, ArH), 7.90 (3H, m, ArH).

# Supplementary Material (ESI) for Chemical Communications

# This journal is (c) The Royal Society of Chemistry 2006

*N,N*-Diisopropyl-2,5-dimethoxybenzamide **4e**. —2,5-Dimethoxybenzoic acid (3.14 g, 17.3 mmol) was dissolved in thionyl chloride (20 ml) and stirred for 60 mins at 90 °C. The mixture was cooled and excess reagent was removed under reduced pressure. The resulting white crystals were dissolved in dichloromethane (25 ml) and was slowly added to a solution of diisopropylamine (7.3 ml, 51.8 mmol) in dichloromethane (50 ml) at 0 °C. After stirring for 3 hours the mixture was diluted with dichloromethane (25 ml), washed with saturated ammonium chloride solution (3 x 30 ml) and solvent removed under reduced pressure. The residue was purified by flash chromatography (SiO<sub>2</sub>; 60:40 Petrol:EtOAc) to give the amide **4e** (3.65 g, 80%) as white crystals, m.p. 92-95 °C; R<sub>f</sub> (70:30 EtOAc) 0.33;  $\nu_{\max}/\text{cm}^{-1}$  2962 and 2931 (C-H), 1634 (C=O);  $\delta_{\text{H}}$ (500 MHz; CDCl<sub>3</sub>) 0.90 (3H, d, *J* 7, CH<sub>3</sub>), 1.01 (3H, d, *J* 7, CH<sub>3</sub>), 1.40 (3H, d, *J* 7, CH<sub>3</sub>), 1.42 (3H, d, *J* 7, CH<sub>3</sub>), 3.32 (1H, sept, *J* 7, NCH), 3.51 (1H, sept, *J* 7, NCH), 3.63 (6H, s, OMe), 6.58 (1H, s, ArH), 6.67 (2H, m, ArH);  $\delta_{\text{C}}$ (125 MHz; CDCl<sub>3</sub>) 20.7, 20.8, 21.2, 21.2, 46.1, 51.3, 56.2, 56.5, 112.6, 112.9, 114.8, 129.7, 149.6, 154.2, 168.5; *m/z* (CI) 266 (100%, M+H); Acc. mass found (M+H) 266.1748 (C<sub>15</sub>H<sub>24</sub>NO<sub>3</sub> requires (*M*) 266.1751).

2-(Di-*tert*-butylphosphino)-*N,N*-diethylbenzamide **4f**.<sup>12</sup> —By method A, amide **1b** (1.07 g, 6.0 mmol) and di(*tert*-butyl)phosphine chloride (1.26 ml, 6.6 mmol) gave a residue which was purified by flash chromatography (SiO<sub>2</sub>; Petrol:EtOAc 70:30) to give the phosphine (1.15 g, 60%) as yellow crystals, m.p. 58-60 °C; R<sub>f</sub> (70:30 EtOAc) 0.50;  $\nu_{\max}/\text{cm}^{-1}$  2970 & 2864 (C-H), 1634 (C=O);  $\delta_{\text{H}}$ (500 MHz; CDCl<sub>3</sub>) 1.08 (3H, t, *J* 7, CH<sub>3</sub>), 1.19 (9H, d, *J* 12, <sup>t</sup>Bu), 1.23 (9H, d, *J* 12, <sup>t</sup>Bu), 1.29 (3H, t, *J* 7, CH<sub>3</sub>), 3.02 (1H, m, NCH<sub>2</sub>), 3.17 (1H, m, NCH<sub>2</sub>), 3.36 (1H, m, NCH<sub>2</sub>), 3.82 (1H, m, NCH<sub>2</sub>), 7.23 (1H, m, ArH), 7.33-7.38 (2H, m, ArH), 7.82 (1H, d, *J* 8, ArH);  $\delta_{\text{C}}$ (125 MHz; CDCl<sub>3</sub>) 12.9, 14.4, 30.7 (3C, d, *J* 18, PCCH<sub>3</sub>), 31.7 (3C, d, *J* 18, PCHCH<sub>3</sub>), 32.7 (1C, d, *J* 24, PC), 33.3 (1C, d, *J* 24, PC), 38.7, 43.4, 126.4, 126.4, 127.3, 129.3, 135.6, 146.9, 147.2; *m/z* (CI) 322 (100%, M+H); Acc. mass found (M+H) 322.2291 (C<sub>19</sub>H<sub>32</sub>NOP requires (*M*) 322.2294).

2-(Dimethylamino)-*N,N*-diethylbenzamide **4g**.<sup>13</sup> —2-(Diimethylamino)benzoic acid (3.89 g, 23.0 mmol) was dissolved in thionyl chloride (20 ml) and stirred for 30 mins. Excess reagent was removed under reduced pressure. The resulting yellow oil was dissolved in dichloromethane (25 ml) and was slowly added to a solution of diethylamine (7.1 ml, 69 mmol) in dichloromethane (100 ml) at 0 °C. After stirring for 3 hours the mixture was diluted with dichloromethane (25

# Supplementary Material (ESI) for Chemical Communications

# This journal is (c) The Royal Society of Chemistry 2006

ml), washed with saturated ammonium chloride solution (3 x 30 ml) and solvent removed under reduced pressure. The residue was purified by flash chromatography (SiO<sub>2</sub>; 80:20 Petrol:EtOAc) to give the amide (3.33 g, 65%) as an orange oil, R<sub>f</sub> (70:30 Petrol:EtOAc) 0.52; δ<sub>H</sub>(300 MHz; CDCl<sub>3</sub>) 1.04 (3H, t, *J* 7, CH<sub>3</sub>), 1.22 (3H, t, *J* 7, CH<sub>3</sub>), 2.82 (6H, s, CH<sub>3</sub>), 3.09 (1H, m, NCH<sub>2</sub>), 3.23 (1H, m, NCH<sub>2</sub>), 3.36 (1H, m, NCH<sub>2</sub>), 3.84 (1H, m, NCH<sub>2</sub>), 6.93 (1H, d, *J* 8, ArH), 6.95 (1H, t, *J* 8, ArH), 7.20 (1H, d, *J* 8, ArH), 7.30 (1H, t, *J* 8, ArH).

*2-(2-(tert-Butylsulfinyl)phenyl)-4,5-dihydro-4,4-dimethyloxazole 2a*. —By method A, oxazole **1a** (270 mg, 1.54 mmol) and *t*-butyl *t*-butylthiosulfinate<sup>3</sup> (270 mg, 1.85 mmol) gave a residue which was purified by flash chromatography (SiO<sub>2</sub>; Petrol:EtOAc 20:80) to give the *sulfoxide 2a* (238 g, 56%) as white crystals, R<sub>f</sub> (EtOAc) 0.46; ν<sub>max</sub>/cm<sup>-1</sup> 2975 (C-H), 1633 (C=O); δ<sub>H</sub>(500 MHz; CDCl<sub>3</sub>) 1.12 (9H, s, <sup>t</sup>Bu), 1.31 (3H, s, CH<sub>3</sub>), 1.34 (3H, s, CH<sub>3</sub>), 4.05 (2H, m, CH<sub>2</sub>O), 7.44 (1H, t, *J* 8, ArH), 7.59 (1H, t, *J* 8, ArH), 7.91 (1H, d, *J* 8, ArH), 8.02 (1H, d, *J* 8, ArH); δ<sub>C</sub>(125 MHz; CDCl<sub>3</sub>) 23.9, 28.6, 28.8, 58.9, 68.3, 79.5, 126.8, 128.0, 130.4, 130.7, 131.1, 142.3, 161.0; *m/z* (CI) 280 (100%, M+H); Acc. mass found (M+H) 280.1364 (C<sub>15</sub>H<sub>21</sub>NSO<sub>2</sub> requires (*M*) 280.1371).

*2-(tert-Butylsulfinyl)-N,N-diisopropylbenzamide 2b*. —By method A, amide **1b** (1.0 g, 5.62 mmol) and *t*-butyl *t*-butylthiosulfinate<sup>3</sup> (984 mg, 6.74 mmol) gave a residue which was purified by flash chromatography (SiO<sub>2</sub>; Petrol:EtOAc 30:70) to give the *sulfoxide 2b* (1.0 g, 63%) as a pale yellow oil, R<sub>f</sub> (70:30 EtOAc) 0.10; ν<sub>max</sub>/cm<sup>-1</sup> 2976, 2934 (C-H), 1632 (C=O); δ<sub>H</sub>(500 MHz; CDCl<sub>3</sub>) 1.03 (3H, t, *J* 7, CH<sub>3</sub>), 1.23 (9H, s, <sup>t</sup>Bu), 1.26 (3H, t, *J* 7, CH<sub>3</sub>), 3.17-3.20 (2H, m, NCH<sub>2</sub>), 3.28 (1H, m, NCH<sub>2</sub>), 3.86 (1H, m, NCH<sub>2</sub>), 7.34 (1H, d, *J* 8, ArH), 7.54-7.59 (2H, m, ArH), 7.93 (1H, d, *J* 8, ArH); δ<sub>C</sub>(125 MHz; CDCl<sub>3</sub>) 12.9, 14.3, 23.7, 39.5, 43.5, 48.1, 126.9, 127.3, 129.5, 132.1, 137.8, 139.0, 168.0; *m/z* (CI) 282 (80%, M+H), 209 (100%); Acc. mass found (M+H) 282.1518 (C<sub>15</sub>H<sub>23</sub>NSO<sub>2</sub> requires (*M*) 282.1522).

*2-(tert-Butylsulfinyl)-N,N-diisopropylbenzamide 2c*. —By method A, amide **1c** (527 mg, 2.56 mmol) and *t*-butyl *t*-butylthiosulfinate<sup>3</sup> (411 mg, 2.82 mmol) gave a residue which was purified by flash chromatography (SiO<sub>2</sub>; Petrol:EtOAc 30:70) to give the *sulfoxide 2c* (341 mg, 43%) as white crystals, m.p. 80-81 °C; R<sub>f</sub> (70:30 EtOAc) 0.16; ν<sub>max</sub>/cm<sup>-1</sup> 2969 (C-H), 1635 (C=O); δ<sub>H</sub>(500 MHz; CDCl<sub>3</sub>) 0.91 (3H, d, *J* 7, CH<sub>3</sub>), 1.26-1.27 (12H, m, CH<sub>3</sub>), 1.55 (3H, d, *J* 7, CH<sub>3</sub>),

# Supplementary Material (ESI) for Chemical Communications

# This journal is (c) The Royal Society of Chemistry 2006

1.57 (3H, d,  $J$  7, CH<sub>3</sub>), 3.52-3.61 (2H, m, NCH), 7.25 (1H, m, ArH), 7.52-7.62 (2H, m, ArH), 7.95 (1H, m, ArH);  $\delta_{\text{C}}$ (125 MHz; CDCl<sub>3</sub>) 20.3, 20.8, 21.0, 21.2, 23.8, 46.4, 51.5, 58.1, 126.3, 127.0, 129.0, 132.3, 138.2, 139.5, 167.8;  $m/z$  (CI) 310 (20%, M+H), 238 (40%), 206 (100%); Acc. mass found (M+H) 310.1838 (C<sub>17</sub>H<sub>27</sub>NSO<sub>2</sub> requires ( $M$ ) 310.1835).

*N-tert-Butyl-2-(tert-butylsulfinyl)-N-methylbenzamide 2d*. —By method A, **1d** (1.09 g, 5.7 mmol) and *t*-butyl *t*-butylthiosulfinate<sup>3</sup> (1.44 g, 7.4 mmol) gave a residue which was purified by flash chromatography (SiO<sub>2</sub>; Petrol:EtOAc 20:80) to give the *sulfoxide 2d* (1.49 g, 89%) as a colourless oil,  $R_{\text{f}}$  (EtOAc) 0.45;  $\nu_{\text{max}}/\text{cm}^{-1}$  2963, 2926 (C-H), 1634 (C=O);  $\delta_{\text{H}}$ (300 MHz; CDCl<sub>3</sub>) 1.22 (9H, s, <sup>t</sup>Bu), 1.55 (9H, s, <sup>t</sup>Bu), 2.82 (3H, s, NMe), 7.35 (1H, m, ArH), 7.56-7.60 (2H, m, ArH), 7.95 (1H, m, ArH);  $\delta_{\text{C}}$ (75 MHz; CDCl<sub>3</sub>) 23.5, 28.2, 34.6, 57.6, 58.1, 126.6, 127.3, 129.1, 132.2, 137.3, 140.0, 169.3;  $m/z$  (CI) 296 (30%, M+H), 222 (40%), 209 (100%); Acc. mass found (M+H) 296.1685 (C<sub>16</sub>H<sub>25</sub>NO<sub>2</sub>S requires ( $M$ ) 296.1679).

*2-(tert-Butylsulfinyl)-N-isopropylbenzamide 2f*. —By method A, amide **1f** (287 mg, 1.76 mmol) and *t*-butyl *t*-butylthiosulfinate<sup>3</sup> (309 mg, 2.12 mmol) gave a residue which was purified by flash chromatography (SiO<sub>2</sub>; EtOAc) to give the *sulfoxide 2f* (326 mg, 69%) as a colourless oil,  $R_{\text{f}}$  (EtOAc) 0.41;  $\nu_{\text{max}}/\text{cm}^{-1}$  2973 (C-H), 1643 (C=O);  $\delta_{\text{H}}$ (500 MHz; CDCl<sub>3</sub>) 1.01 (9H, s, <sup>t</sup>Bu), 1.16 (3H, d,  $J$  7, CH<sub>3</sub>), 1.19 (3H, d,  $J$  7, CH<sub>3</sub>), 4.11 (1H, sept,  $J$  7, NCH), 7.25 (1H, t,  $J$  8, ArH), 7.33 (1H, t,  $J$  8, ArH), 7.41 (1H, d,  $J$  8, ArH), 7.51 (1H, d,  $J$  8, ArH), 7.66 (1H, d,  $J$  8, NH);  $\delta_{\text{C}}$ (125 MHz; CDCl<sub>3</sub>) 22.7, 22.9, 23.4, 42.4, 57.8, 126.0, 128.7, 130.0, 131.0, 137.4, 138.4, 166.4;  $m/z$  (CI) 268 (80%, M+H), 211 (50%), 194 (100%); Acc. mass found (M+H) 268.1364 (C<sub>14</sub>H<sub>21</sub>NSO<sub>2</sub> requires ( $M$ ) 268.1366).

*1-(tert-Butylsulfinyl)-2-methoxybenzene 2g*. —By method A, freshly distilled anisole (0.15 ml, 1.37 mmol) and *t*-butyl *t*-butylthiosulfinate<sup>3</sup> (240 mg, 1.64 mmol) gave a residue which was purified by flash chromatography (SiO<sub>2</sub>; Petrol:EtOAc 60:40) to give the *sulfoxide* (116 mg, 40%) as a colourless liquid,  $R_{\text{f}}$  (EtOAc) 0.66;  $\nu_{\text{max}}/\text{cm}^{-1}$  2976, 2900 (C-H), 1586 (C=O);  $\delta_{\text{H}}$ (500 MHz; CDCl<sub>3</sub>) 1.17 (9H, s, <sup>t</sup>Bu), 3.81 (3H, s, OMe), 6.87 (1H, d,  $J$  8, ArH), 7.11 (1H, t,  $J$  8, ArH), 7.40 (1H, t,  $J$  8, ArH), 7.72 (1H, d,  $J$  8, ArH);  $\delta_{\text{C}}$ (125 MHz; CDCl<sub>3</sub>) 21.5, 55.8, 57.8, 111.1, 121.3, 127.7, 128.9, 132.6, 132.6, 157.5;  $m/z$  (CI) 213 (100%, M+H); Acc. mass found (M+H) 212.0867 (C<sub>11</sub>H<sub>16</sub>SO<sub>2</sub> requires ( $M$ ) 212.0866).

# Supplementary Material (ESI) for Chemical Communications

# This journal is (c) The Royal Society of Chemistry 2006

*2-(tert-Butylsulfinyl)-N,N-dimethylbenzenamine 2h*. —*n*-BuLi (2.06 ml of a 2.5M solution in hexane) and TMEDA (0.42 ml, 2.9 mmol) were stirred in dry hexane (15 ml) under nitrogen at room temperature before freshly distilled N,N-dimethylaniline (0.15 ml, 1.37 mmol) was added dropwise. The mixture was heated at reflux for 4 hours before being cooled to  $-78\text{ }^{\circ}\text{C}$  and *t*-butyl *t*-butylthiosulfinate<sup>3</sup> (240 mg in 2 ml dry THF, 1.64 mmol) was added dropwise at  $-78\text{ }^{\circ}\text{C}$ . The mixture left to warm to room temperature and quenched with saturated ammonium chloride solution. The THF was removed under reduced pressure and the mixture diluted with dichloromethane (50 ml), washed with saturated ammonium chloride solution (3 x 20 ml), dried (MgSO<sub>4</sub>) and concentrated under reduced pressure. The residue was purified by flash chromatography (SiO<sub>2</sub>; Petrol:EtOAc 20:80) to give the *sulfoxide 2g* (179 mg, 32%) as yellow prisms, *R*<sub>f</sub> (EtOAc) 0.65;  $\nu_{\text{max}}/\text{cm}^{-1}$  2977, 2790 (C-H), 1054 (S=O);  $\delta_{\text{H}}$ (500 MHz; CDCl<sub>3</sub>) 0.99 (9H, s, <sup>t</sup>Bu), 2.55 (6H, s, NMe<sub>2</sub>), 6.93 (1H, dd, *J* 1,8, ArH), 7.04 (1H, td, *J* 1,8, ArH), 7.23 (1H, td, *J* 1,8, ArH), 7.60 (1H, dd, *J* 1,8, ArH);  $\delta_{\text{C}}$ (125 MHz; CDCl<sub>3</sub>) 23.4, 44.9, 57.9, 119.9, 123.9, 127.3, 132.2, 134.9, 153.6; *m/z* (CI) 226 (100%, M+H); Acc. mass found (M+H) 226.1261 (C<sub>12</sub>H<sub>19</sub>NSO requires (*M*) 226.1260).

*2-(2-tert-Butylphenyl)-4,5-dihydro-4,4-dimethyloxazole 3a*. —Method B was used with amide **2a** (169 mg, 0.60 mmol) to give a residue that was purified by flash chromatography (SiO<sub>2</sub>; Petrol:EtOAc 80:20) to give the *2-tert-butyl oxazoline 3a* (111 mg, 73%) as white crystals, *R*<sub>f</sub> (EtOAc) 0.46;  $\nu_{\text{max}}/\text{cm}^{-1}$  2975 (C-H), 1633 (C=O);  $\delta_{\text{H}}$ (500 MHz; CDCl<sub>3</sub>) 1.12 (9H, s, <sup>t</sup>Bu), 1.31 (3H, s, CH<sub>3</sub>), 1.34 (3H, s, CH<sub>3</sub>), 4.05 (2H, m, CH<sub>2</sub>O), 7.44 (1H, t, *J* 8, ArH), 7.59 (1H, t, *J* 8, ArH), 7.91 (1H, d, *J* 8, ArH), 8.02 (1H, d, *J* 8, ArH);  $\delta_{\text{C}}$ (125 MHz; CDCl<sub>3</sub>) 23.9, 28.6, 28.8, 58.9, 68.3, 79.5, 126.8, 128.0, 130.4, 130.7, 131.1, 142.3, 161.0; *m/z* (CI) 280 (100%, M+H); Acc. mass found (M+H) 280.1364 (C<sub>15</sub>H<sub>21</sub>NSO<sub>2</sub> requires (*M*) 280.1371).

*2-tert-Butyl-N,N-diethylbenzamide 3b*. —Method B was used with sulfoxide **2b** (107 mg, 0.32 mmol) to give a residue that was purified by flash chromatography (SiO<sub>2</sub>; Petrol:EtOAc 80:20) to give the *ortho-tert-butyl amide 3b* (128 mg, 100%) as a colourless oil; *R*<sub>f</sub> (70:30 EtOAc) 0.33;  $\nu_{\text{max}}/\text{cm}^{-1}$  2967 (C-H), 1632 (C=O);  $\delta_{\text{H}}$ (500 MHz; CDCl<sub>3</sub>) 0.99 (3H, t, *J* 7, CH<sub>3</sub>), 1.17 (3H, t, *J* 7, CH<sub>3</sub>), 1.31 (9H, s, <sup>t</sup>Bu), 2.96 (1H, m, NCH<sub>2</sub>), 3.08 (1H, m, NCH<sub>2</sub>), 3.25 (1H, m, NCH<sub>2</sub>), 3.71 (1H, m, NCH<sub>2</sub>), 6.97 (1H, dd, *J* 8 and 2, ArH), 7.09 (1H, td, *J* 8 and 1, ArH), 7.22 (1H, td, *J* 8



# Supplementary Material (ESI) for Chemical Communications

# This journal is (c) The Royal Society of Chemistry 2006

and 2, ArH), 7.40 (1H, dd, *J* 8 and 1, ArH);  $\delta_{\text{C}}$ (125 MHz; CDCl<sub>3</sub>) 12.3, 13.6, 31.9, 36.8, 38.8, 43.6, 126.0, 127.7, 127.9, 128.9, 136.1, 146.8, 173.4; *m/z* (CI) 233 (100%, M+H); Acc. mass found (M+H) 234.1847 (C<sub>15</sub>H<sub>23</sub>NO requires (*M*) 234.1852).

*2-tert-Butyl-N,N-diisopropylbenzamide 3c*. —Method B was used with sulfoxide **2c** (100 mg, 0.32 mmol) to give a residue that was purified by flash chromatography (SiO<sub>2</sub>; Petrol:EtOAc 80:20) to give the *ortho-tert-butyl amide 3c* (35 mg, 73%) as white crystals, m.p. 86-87 °C; R<sub>f</sub> (70:30 EtOAc) 0.68;  $\nu_{\text{max}}/\text{cm}^{-1}$  2966 (C-H), 1633 (C=O);  $\delta_{\text{H}}$ (500 MHz; CDCl<sub>3</sub>) 1.02 (3H, d, *J* 7, CH<sub>3</sub>), 1.07 (3H, d, *J* 7, CH<sub>3</sub>), 1.35 (9H, s, <sup>t</sup>Bu), 1.45-1.50 (6H, m, CH<sub>3</sub>), 3.39 (1H, m, NCH), 3.57 (1H, m, NCH), 6.93 (1H, d, *J* 8, ArH), 7.09 (1H, t, *J* 8, ArH), 7.19 (1H, t, *J* 8, ArH), 7.40 (1H, d, *J* 8, ArH);  $\delta_{\text{C}}$ (125 MHz; CDCl<sub>3</sub>) 20.1, 20.1, 20.7, 20.7, 32.1, 36.8, 45.9, 51.1, 125.8, 127.4, 128.1, 128.6, 137.3, 146.9, 173.0; *m/z* (CI) 262 (100%, M+H); Acc. mass found (M+H) 262.2167 (C<sub>17</sub>H<sub>27</sub>NO requires (*M*) 262.2165).

*N,2-Di-tert-butyl-N-methylbenzamide 3d*. —Method B was used with amide **2d** (383 mg, 1.55 mmol) to give a residue that was purified by flash chromatography (SiO<sub>2</sub>; Petrol:EtOAc 80:20) to give the *ortho-tert-butyl amide 3d* (251 mg, 82% yield) as a colourless oil; R<sub>f</sub> (70:30 Petrol:EtOAc) 0.79;  $\nu_{\text{max}}/\text{cm}^{-1}$  2959, 2869 (C-H), 1651 (C=O);  $\delta_{\text{H}}$ (300 MHz; CDCl<sub>3</sub>) 1.42 (9H, s, <sup>t</sup>Bu), 1.57 (9H, s, <sup>t</sup>Bu), 2.75 (3H, s, NMe), 7.00 (1H, d, *J* 8, ArH), 7.17 (1H, t, *J* 8, ArH), 7.27 (1H, t, *J* 8, ArH), 7.45 (1H, t, *J* 8, ArH);  $\delta_{\text{C}}$ (75 MHz; CDCl<sub>3</sub>) 27.4, 27.9, 31.7, 35.5, 36.5, 126.1, 127.4, 127.8, 128.4, 138.4, 146.2, 174.6; *m/z*(CI) 265 (30%, M+NH<sub>4</sub><sup>+</sup>), 248 (100%, M+H); Acc. mass found (M+H) 248.2012 (C<sub>16</sub>H<sub>25</sub>NO requires (*M*) 248.2009).

*2-tert-Butyl-N-methylbenzamide 3e*. —The amide **3d** (178 mg, 0.89 mmol) was dissolved in 3M HCl in dioxane (10 ml) and stirred at reflux for 18 hours. The mixture was then diluted with diethylether (30 ml) and washed with saturated ammonium chloride solution (3 x 20 ml). The residue was then purified via flash chromatography (70:30 Petrol:EtOAc) to give the *amide 3e* (121 mg, 95% yield) as white crystals, m.p. 136-138 °C;  $\nu_{\text{max}}/\text{cm}^{-1}$  3282 (N-H), 2959 (C-H), 1634 (C=O);  $\delta_{\text{H}}$ (500 MHz; CDCl<sub>3</sub>) 1.42 (9H, s, <sup>t</sup>Bu), 3.00 (3H, d, *J* 5, NMe), 5.70 (1H, s (broad), NH), 7.20-7.23 (2H, m, ArH), 7.49 (1H, d, *J* 8, ArH), 7.50 (1H, d, *J* 8, ArH);  $\delta_{\text{C}}$ (75 MHz; CDCl<sub>3</sub>) 26.9, 31.7, 36.4, 125.8, 127.3, 128.5, 129.4, 137.0, 147.6, 173.9; *m/z*(CI) 209

# Supplementary Material (ESI) for Chemical Communications

# This journal is (c) The Royal Society of Chemistry 2006

(100%,  $M+NH_4^+$ ), 192 (50%); Acc. mass found ( $M+H$ ) 192.1384 ( $C_{12}H_{18}NO$  requires ( $M$ ) 192.1383).

*2-tert-Butylanisole* **3g**.<sup>14</sup> —Method B was used with amide **2g** (98 mg, 0.46 mmol) to give a residue that was purified by flash chromatography ( $SiO_2$ ; Petrol:EtOAc 80:20) to give *ortho-tert-butylanisole* **3g** (54 mg, 75%) as a clear liquid,  $R_f$  (70:30 Petrol:EtOAc) 0.92;  $\nu_{max}/cm^{-1}$  2997, 2955 (C-H);  $\delta_H$ (500 MHz;  $CDCl_3$ ) 1.30 (9H, s, <sup>t</sup>Bu), 3.74 (3H, s, OMe), 6.78 (1H, dd,  $J$  8 and 2, ArH), 6.81 (1H, td,  $J$  8 and 2, ArH), 7.10 (1H, td,  $J$  8 and 2, ArH), 7.21 (1H, dd,  $J$  8 and 2, ArH);  $\delta_C$ (125 MHz;  $CDCl_3$ ) 29.3, 35.2, 55.4, 111.9, 120.7, 126.9, 127.4, 138.6, 158.9;  $m/z$  (CI) 165 (100%,  $M+H$ ); Acc. mass found ( $M^+$ ) 164.1192 ( $C_{11}H_{16}O$  requires ( $M$ ) 164.1198).

*2-(tert-Butylsulfinyl)-N,N-diisopropyl-6-methoxybenzamide* **5a**. —By method A, amide **4a** (860 mg, 4.15 mmol) and *t*-butyl *t*-butylthiosulfinate<sup>3</sup> (789 mg, 5.40 mmol) gave a residue which was purified by flash chromatography ( $SiO_2$ ; Petrol:EtOAc 30:70) to give the *sulfoxide* **5a** (932 mg, 72%). m.p. 72-74 °C;  $R_f$  (70:30 EtOAc) 0.40;  $\nu_{max}/cm^{-1}$  2970, 2934 (C-H), 1634 (C=O);  $\delta_H$ (500 MHz;  $CDCl_3$ ) 1.08 (3H, d,  $J$  7,  $CH_3$ ), 1.21 (3H, d,  $J$  7,  $CH_3$ ), 1.28 (9H, s, <sup>t</sup>Bu), 1.55 (3H, d,  $J$  7,  $CH_3$ ), 1.56 (3H, d,  $J$  7,  $CH_3$ ), 3.52 (1H, sept,  $J$  7, NCH), 3.57 (1H, sept,  $J$  7, NCH), 3.84 (3H, s, OMe), 7.01 (1H, d,  $J$  8, ArH), 7.47-7.49 (2H, m, ArH);  $\delta_C$ (125 MHz;  $CDCl_3$ ) 20.5, 20.7, 21.0, 21.1, 24.0, 46.4, 51.5, 56.3, 58.2, 113.8, 118.7, 129.1, 129.7, 139.5, 155.6, 164.9;  $m/z$  (CI) 340 (90%,  $M+H$ ), 284 (90%), 268 (100%); Acc. mass found ( $M+H$ ) 340.1938 ( $C_{18}H_{29}NSO_3$  requires ( $M$ ) 340.1941).

*2-(tert-Butylsulfinyl)-N,N-diisopropyl-3-methoxybenzamide* **5b**. —By method A, **4b** (270 mg, 1.15 mmol) and *t*-butyl *t*-butylthiosulfinate<sup>3</sup> (290 mg, 1.49 mmol) gave a residue which was purified by flash chromatography ( $SiO_2$ ; Petrol:EtOAc 40:60) to give the *sulfoxide* **5b** (330 mg, 85%) as white crystals, m.p. 98-100 °C;  $R_f$  (70:30 Petrol:EtOAc) 0.16;  $\nu_{max}/cm^{-1}$  2969 (C-H), 1631 (C=O);  $\delta_H$ (300 MHz;  $CDCl_3$ ) 1:1 mixture of diastereoisomeric signals 0.86 (3H, d,  $J$  7,  $CH_3$ ), 0.94 (3H, d,  $J$  7,  $CH_3$ ), 1.08 (3H, d,  $J$  7,  $CH_3$ ), 1.17 (3H, d,  $J$  7,  $CH_3$ ), 1.21 (9H, s, <sup>t</sup>Bu), 1.26 (9H, s, <sup>t</sup>Bu), 1.40-1.47 (12H, m,  $CH_3$ ), 3.23 (1H, sept,  $J$  7, NCH), 3.28 (1H, sept,  $J$  7, NCH), 3.39 (1H, sept,  $J$  7, NCH), 3.61 (1H, sept,  $J$  7, NCH), 3.73 (3H, s, OMe), 3.80 (3H, s, OMe), 6.67 (2H, t,  $J$  8, ArH), 6.72 (1H, d,  $J$  8, ArH), 6.86 (1H, d,  $J$  8, ArH), 7.26 (1H, t,  $J$  8, ArH), 7.35 (1H, t,  $J$  8, ArH);  $\delta_C$ (75 MHz;  $CDCl_3$ ) 19.3, 19.7, 20.6, 20.7, 20.7, 20.8, 20.9, 20.9,

# Supplementary Material (ESI) for Chemical Communications

# This journal is (c) The Royal Society of Chemistry 2006

25.2, 25.9, 45.4, 46.0, 50.8, 51.2, 55.7, 55.8, 58.8, 60.1, 110.2, 112.1, 117.7, 121.1, 123.9, 126.4, 131.9, 133.7, 140.1, 142.9, 157.2, 159.6, 167.7, 168.3;  $m/z$  (CI) 340 (100%, M+H) 266 (40%); Acc. mass found (M+H) 340.1950 (C<sub>18</sub>H<sub>30</sub>NO<sub>3</sub>S requires (*M*) 340.1941).

*2-(tert-Butylsulfinyl)-N,N-diisopropyl-4-methoxybenzamide 5c*. —By method A, **4c** (295 mg, 1.26 mmol) and *t*-butyl *t*-butylthiosulfinate<sup>3</sup> (317 mg, 1.63 mmol) gave a residue which was purified by flash chromatography (SiO<sub>2</sub>; Petrol:EtOAc 40:60) to give the *sulfoxide 5c* (374 mg, 88%) as a colourless oil,  $R_f$  (70:30 Petrol:EtOAc) 0.15;  $\nu_{\max}/\text{cm}^{-1}$  2965, 2933 (C-H), 1651 (C=O);  $\delta_{\text{H}}$ (300 MHz; CDCl<sub>3</sub>) 0.85 (6H, m (broad), CH<sub>3</sub>), 1.13 (9H, s, <sup>t</sup>Bu), 1.20 (6H, m (broad), CH<sub>3</sub>), 3.30-3.50 (2H, m, NCH), 3.73 (3H, s, OMe), 6.92 (1H, dd, *J* 8 and 1, ArH), 7.05 (1H, d, *J* 8, ArH), 7.28 (1H, d, *J* 1, ArH);  $\delta_{\text{C}}$ (75 MHz; CDCl<sub>3</sub>) 20.1, 20.5, 20.8, 21.0, 23.6., 46.1, 51.2, 55.7, 57.9, 110.3, 118.9, 127.5, 131.7, 138.9, 159.7, 167.6;  $m/z$  (CI) 340 (100%, M+H) 266 (80%); Acc. mass found (M+H) 340.1946 (C<sub>18</sub>H<sub>29</sub>NO<sub>3</sub>S requires (*M*) 340.1941).

*2-(tert-Butylsulfinyl)-N,N-diisopropyl-naphthalene-1-carboxamide 5d*. —By method A, **4d** (811 mg, 3.18 mmol) and *t*-butyl *t*-butylthiosulfinate<sup>3</sup> (603 mg, 4.13 mmol, 94% ee) gave a residue which was purified by flash chromatography (SiO<sub>2</sub>; Petrol:EtOAc 50:50) to give the *sulfoxide* (730 mg, 64%) as yellow crystals, m.p. 35-36 °C;  $R_f$  (70:30 Petrol:EtOAc) 0.20;  $\nu_{\max}/\text{cm}^{-1}$  2973, 2934 (C-H), 1633 (C=O);  $\delta_{\text{H}}$ (500 MHz; CDCl<sub>3</sub>) 0.72 (3H, d, *J* 7, CH<sub>3</sub>), 1.04 (3H, d, *J* 7, CH<sub>3</sub>), 1.10 (9H, s, <sup>t</sup>Bu), 1.45 (3H, d, *J* 7, CH<sub>3</sub>), 1.54 (3H, d, *J* 7, CH<sub>3</sub>), 3.21 (1H, sept, *J* 7, NCH), 3.44 (1H, sept, *J* 7, NCH), 7.37-7.43 (2H, m, ArH), 7.68-7.78 (4H, m, ArH);  $\delta_{\text{C}}$ (125 MHz; CDCl<sub>3</sub>) 20.4, 20.9, 21.0, 21.6, 24.1, 46.8, 51.8, 58.5, 121.9, 126.2, 128.1, 128.7, 128.8, 129.0, 129.5, 134.3, 135.2, 137.9, 166.7;  $m/z$  (CI) 360 (70%, M+H), 304 (100%); Acc. mass found (M+H) 360.1985 (C<sub>21</sub>H<sub>29</sub>NSO<sub>2</sub> requires (*M*) 360.1992).

*2-(tert-Butylsulfinyl)-N,N-diisopropyl-3,6-dimethoxybenzamide 5e*. —By method A, **4e** (295 mg, 1.11 mmol) and *t*-butyl *t*-butylthiosulfinate<sup>3</sup> (281 mg, 1.45 mmol,) gave a residue which was purified by flash chromatography (SiO<sub>2</sub>; EtOAc) to give the *sulfoxide 5e* (61 mg, 15%) as white crystals, m.p. 116-118 °C;  $R_f$  (EtOAc) 0.22;  $\nu_{\max}/\text{cm}^{-1}$  2969, 2838 (C-H), 1633 (C=O);  $\delta_{\text{H}}$ (500 MHz; CDCl<sub>3</sub>) 1.08 (3H, d, *J* 7, CH<sub>3</sub>), 1.22 (3H, d, *J* 7, CH<sub>3</sub>), 1.35 (9H, s, <sup>t</sup>Bu), 1.51-1.53 (6H, d, *J* 7, CH<sub>3</sub>), 3.47 (1H, sept, *J* 7, NCH), 3.67 (1H, sept, *J* 7, NCH), 3.76 (3H, s, OMe), 3.84 (3H, s, OMe), 6.85 (1H, d, *J* 8, ArH), 6.93 (1H, d, *J* 8, ArH);  $\delta_{\text{C}}$ (75 MHz; CDCl<sub>3</sub>) 20.1, 20.8, 20.9,

# Supplementary Material (ESI) for Chemical Communications

# This journal is (c) The Royal Society of Chemistry 2006

21.2, 26.3, 46.4, 51.6, 56.1, 56.6, 59.1, 112.3, 115.4, 125.8, 132.1, 149.2, 153.5, 164.9;  $m/z$  (CI) 370 (10%, M+H), 314 (50%), 298 (100%); Acc. mass found (M+H) 370.2051 ( $C_{19}H_{32}NO_4S$  requires ( $M$ ) 370.2047).

*2-(Di-tert-butylphosphino)-6-(tert-butylsulfinyl)-N,N-diethylbenzamide 5f*. —By method A, amide **4f** (323 mg, 1.0 mmol) and *t*-butyl *t*-butylthiosulfinate<sup>3</sup> (160 mg, 1.4 mmol) gave a residue which was purified by flash chromatography (SiO<sub>2</sub>; Petrol:EtOAc 70:30) to give the *sulfoxide 5f* (207 mg, 49%) as an opaque oil, m.p. 50-52 °C;  $R_f$  (70:30 EtOAc) 0.23;  $\nu_{max}/cm^{-1}$  2934, 2568 (C-H), 1632 (C=O);  $\delta_H$ (500 MHz; CDCl<sub>3</sub>) 1.16 (9H, d,  $J$  12, P<sup>t</sup>Bu), 1.19 (3H, t,  $J$  7, CH<sub>3</sub>), 1.25 (9H, d,  $J$  12, P<sup>t</sup>Bu), 1.26 (9H, s, S(O)<sup>t</sup>Bu), 1.31 (3H, t,  $J$  7, CH<sub>3</sub>), 3.03 (1H, m, NCH<sub>2</sub>), 3.08 (1H, m, NCH<sub>2</sub>), 3.58-3.63 (2H, m, NCH<sub>2</sub>), 7.54 (1H, t,  $J$  8, ArH), 7.97 (2H, d,  $J$  8, ArH);  $\delta_C$ (125 MHz; CDCl<sub>3</sub>) 12.5, 14.4, 23.9, 30.5 (3C, d,  $J$  15, PCCH<sub>3</sub>), 31.7 (3C, d,  $J$  15, PCCH<sub>3</sub>), 32.7 (1C, d,  $J$  25, PC), 33.4 (1C, d,  $J$  25, PC), 39.0, 43.5, 58.4, 127.4, 127.6, 138.6, 139.1, 145.8, 146.1, 166.8;  $m/z$  (CI) 426 (30%, M+H), 354 (100%); Acc. mass found (M+H) 426.2586 ( $C_{23}H_{40}NSO_2P$  requires ( $M$ ) 426.2590).

*2-(tert-Butylsulfinyl)-6-(dimethylamino)-N,N-diethylbenzamide 5g*. —By method A, amide **4g** (385 mg, 1.75 mmol) and *t*-butyl *t*-butylthiosulfinate<sup>3</sup> (383 mg, 2.63 mmol) gave a residue which was purified by flash chromatography (SiO<sub>2</sub>; Petrol:EtOAc 50:50) to give the *sulfoxide 5g* (473 mg, 83%) as an orange oil;  $R_f$  (70:30 Petrol:EtOAc) 0.08;  $\nu_{max}/cm^{-1}$  2974, 2790 (C-H), 1635 (C=O);  $\delta_H$ (500 MHz; CDCl<sub>3</sub>) 0.95 (3H, t,  $J$  7, CH<sub>3</sub>), 1.18 (3H, t,  $J$  7, CH<sub>3</sub>), 1.20 (9H, s, <sup>t</sup>Bu), 2.74 (6H, s, NMe<sub>2</sub>), 2.91 (2H, m, NCH<sub>2</sub>), 3.47 (2H, m, NCH<sub>2</sub>), 7.03 (1H, dd,  $J$  8 and 1, ArH), 7.38 (1H, t,  $J$  8, ArH), 7.43 (1H, dd,  $J$  8 and 1, ArH);  $\delta_C$ (125 MHz; CDCl<sub>3</sub>) 12.8, 14.2, 24.1, 39.8, 43.3, 44.9, 58.3, 119.7, 121.2, 129.8, 132.2, 140.4, 150.7, 167.3;  $m/z$  (CI) 325 (50%, M+H), 269 (40%), 252 (100%); Acc. mass found (M+H) 325.1949 ( $C_{19}H_{32}N_2SO_2$  requires ( $M$ ) 325.1944).

*2-tert-Butyl-N,N-diisopropyl-6-methoxybenzamide 6a*. —Method B was used with sulfoxide **5a** (114 mg, 0.37 mmol, 98% ee) to give a residue that was purified by flash chromatography (SiO<sub>2</sub>; Petrol:EtOAc 70:30) to give the *amide 6a* (36 mg, 38%) as white crystals, m.p. 74-76 °C;  $R_f$  (70:30 EtOAc) 0.65;  $\nu_{max}/cm^{-1}$  2926 (C-H), 1614 (C=O);  $\delta_H$ (500 MHz; CDCl<sub>3</sub>) 1.00 (3H, d,  $J$  7, CH<sub>3</sub>), 1.04 (3H, d,  $J$  7, CH<sub>3</sub>), 1.33 (9H, s, <sup>t</sup>Bu), 1.36 (3H, d,  $J$  7, CH<sub>3</sub>), 1.48 (3H, d,  $J$  7, CH<sub>3</sub>),

# Supplementary Material (ESI) for Chemical Communications

# This journal is (c) The Royal Society of Chemistry 2006

3.38 (1H, sept, *J* 7, NCH), 3.54 (1H, sept, *J* 7, NCH), 3.67 (3H, s, OMe), 6.63 (1H, d, *J* 8, ArH), 6.99 (1H, d, *J* 8, ArH), 7.13 (1H, t, *J* 8, ArH);  $\delta_{\text{C}}$ (125 MHz; CDCl<sub>3</sub>); 20.2, 20.3, 20.4, 20.5, 32.5, 33.1, 46.2, 50.9, 55.7, 108.5, 120.6, 126.8, 126.8, 128.7, 148.3, 156.5, 169.8; *m/z* (CI) 292 (100%, M+H); Acc. mass found (M+H) 292.2268 (C<sub>18</sub>H<sub>29</sub>NO<sub>2</sub> requires (*M*) 292.2271).

*2-tert-Butyl-N,N-diisopropyl-3-methoxybenzamide 6b*. —Method B was used with amide **5b** (230 mg, 0.68 mmol) to give a residue that was purified by flash chromatography (SiO<sub>2</sub>; Petrol:EtOAc 80:20) to give the *amide 6b* (30 mg, 15% yield) as a colourless oil (mixture of product and starting material); *R<sub>f</sub>* (70:30 Petrol:EtOAc) 0.75;  $\nu_{\text{max}}/\text{cm}^{-1}$  2966 (C-H), 1632 (C=O);  $\delta_{\text{H}}$ (500 MHz; CDCl<sub>3</sub>) 1.08-1.12 (6H, m, CH<sub>3</sub>), 1.39 (9H, s, <sup>t</sup>Bu), 1.42-1.50 (6H, m, CH<sub>3</sub>), 3.43-3.47 (2H, m, NCH), 3.61 (3H, s, OMe), 6.50 (1H, d, *J* 7, ArH), 6.77 (1H, t, *J* 8, ArH), 7.05 (1H, t, *J* 8, ArH);  $\delta_{\text{C}}$ (75 MHz; CDCl<sub>3</sub>) Mixture of compounds; *m/z*(CI) 292 (100%, M+H); Acc. mass found (M+H) 292.2275 (C<sub>18</sub>H<sub>30</sub>NO<sub>2</sub> requires (*M*) 292.2271).

*2-tert-Butyl-N,N-diisopropyl-4-methoxybenzamide 6c*. —Method B was used with amide **5c** (176 mg, 0.52 mmol) to give a residue that was purified by flash chromatography (SiO<sub>2</sub>; Petrol:EtOAc 80:20) to give the *amide 6c* (119 mg, 79% yield) as a colourless oil; *R<sub>f</sub>* (70:30 Petrol:EtOAc) 0.85;  $\nu_{\text{max}}/\text{cm}^{-1}$  2965 (C-H), 1634 (C=O);  $\delta_{\text{H}}$ (300 MHz; CDCl<sub>3</sub>) 1.10 (3H, d, *J* 7, CH<sub>3</sub>), 1.13 (3H, d, *J* 7, CH<sub>3</sub>), 1.43 (9H, s, <sup>t</sup>Bu), 1.55 (3H, d, *J* 7, CH<sub>3</sub>), 1.56 (3H, d, *J* 7, CH<sub>3</sub>), 3.46 (1H, sept, *J* 7, NCH), 3.71 (1H, sept, *J* 7, NCH), 3.82 (3H, s, OMe), 6.70 (1H, dd, *J* 3,8, ArH), 6.96 (1H, d, *J* 8, ArH), 7.03 (1H, d, *J* 3,8, ArH);  $\delta_{\text{C}}$ (75 MHz; CDCl<sub>3</sub>) 20.0, 20.1, 20.5, 20.6, 31.9, 36.7, 45.7, 50.9, 55.4, 110.0, 114.4, 128.5, 130.1, 148.9, 159.4, 172.9; *m/z*(CI) 292 (100%, M+H); Acc. mass found (M+H) 292.2277 (C<sub>18</sub>H<sub>30</sub>NO<sub>2</sub> requires (*M*) 292.2271).

*N,N,2-Triisopropyl-4-methoxybenzamide 6c'*. —Method B was used with amide **5c** (140 mg, 0.41 mmol) to give a residue that was purified by flash chromatography (SiO<sub>2</sub>; Petrol:EtOAc 80:20) to give the *ortho-isopropyl amide 6c'* (57 mg, 50% yield) as a colourless oil; *R<sub>f</sub>* (70:30 Petrol:EtOAc) 0.71;  $\nu_{\text{max}}/\text{cm}^{-1}$  2964 (C-H), 1633 (C=O);  $\delta_{\text{H}}$ (300 MHz; CDCl<sub>3</sub>) 1.10 (3H, d, *J* 7, CH<sub>3</sub>), 1.12 (3H, d, *J* 7, CH<sub>3</sub>), 1.25 (3H, d, *J* 7, CH<sub>3</sub>), 1.29 (3H, d, *J* 7, CH<sub>3</sub>), 1.57-1.59 (6H, m, CH<sub>3</sub>), 3.00 (1H, sept, *J* 7, ArCH), 3.48 (1H, sept, *J* 7, NCH), 3.76 (1H, sept, *J* 7, NCH), 3.84 (3H, s, OMe), 6.71 (1H, dd, *J* 3, 8, ArH), 6.86 (1H, d, *J* 3, ArH), 7.02 (1H, d, *J* 8, ArH);  $\delta_{\text{C}}$ (75 MHz; CDCl<sub>3</sub>) 20.8, 20.8, 20.9, 20.9, 23.6, 24.9, 30.9, 45.9, 50.9, 55.4, 111.0, 111.9, 126.2,

# Supplementary Material (ESI) for Chemical Communications

# This journal is (c) The Royal Society of Chemistry 2006

130.7, 147.0, 160.0, 171.1;  $m/z$ (CI) 278 (100%, M+H); Acc. mass found (M+H) 278.2116 (C<sub>17</sub>H<sub>28</sub>NO<sub>2</sub> requires (M) 278.2115).

*2-tert-Butyl-N,N-diisopropyl-naphthalene-1-carboxamide 6d*. —Method B was used with amide **5d** (125 mg, 0.35 mmol, 52% ee) to give a residue that was purified by flash chromatography (SiO<sub>2</sub>; Petrol:EtOAc 80:20) to give the *amide 6d* (62 mg, 58%) as white crystals, m.p. 94-97 °C; R<sub>f</sub> (70:30 EtOAc) 0.57;  $\nu_{\max}/\text{cm}^{-1}$  2966 (C-H), 1603 (C=O);  $\delta_{\text{H}}$ (500 MHz; CDCl<sub>3</sub>) 0.73 (3H, d, *J* 7, CH<sub>3</sub>), 1.04 (3H, d, *J* 7, CH<sub>3</sub>), 1.43 (9H, s, <sup>t</sup>Bu), 1.56 (3H, d, *J* 7, CH<sub>3</sub>), 1.71 (3H, d, *J* 7, CH<sub>3</sub>), 3.41 (1H, sept, *J* 7, NCH), 3.51 (1H, sept, *J* 7, NCH), 7.30-7.37 (2H, m, ArH), 7.52 (1H, d, *J* 8, ArH), 7.63-7.67 (2H, m, ArH), 7.81 (1H, d, *J* 8, ArH);  $\delta_{\text{C}}$ (125 MHz; CDCl<sub>3</sub>) 19.9, 19.9, 20.8, 21.1, 32.5, 37.7, 46.7, 51.4, 126.0, 126.1, 126.2, 126.4, 127.1, 127.9, 128.1, 131.0, 132.2, 142.8, 171.6;  $m/z$  (CI) 312 (100%, M+H); Acc. mass found (M+H) 312.2325 (C<sub>21</sub>H<sub>29</sub>NO requires (M) 312.2322).

*2-tert-Butyl-N,N-diisopropyl-3-methoxybenzamide 6e*. —Method B was used with sulfoxide **5e** (45 mg, 0.12 mmol) to give a residue that was purified by flash chromatography (SiO<sub>2</sub>; Petrol:EtOAc 80:20) to give the *amide 6e* (30 mg, 76% yield) as white needles, m.p. 119-122 °C; R<sub>f</sub> (70:30 Petrol:EtOAc) 0.63;  $\nu_{\max}/\text{cm}^{-1}$  2967 (C-H), 1621 (C=O);  $\delta_{\text{H}}$ (500 MHz; CDCl<sub>3</sub>) 0.95 (3H, d, *J* 7, CH<sub>3</sub>), 1.07 (3H, d, *J* 7, CH<sub>3</sub>), 1.39 (9H, s, <sup>t</sup>Bu), 1.43 (3H, d, *J* 7, CH<sub>3</sub>), 1.47 (3H, d, *J* 7, CH<sub>3</sub>), 3.36 (1H, sept, *J* 7, NCH), 3.58 (1H, sept, *J* 7, NCH), 3.62 (3H, s, OMe), 3.72 (3H, s, OMe), 6.62 (1H, d, *J* 8, ArH), 6.72 (1H, d, *J* 8, ArH);  $\delta_{\text{C}}$ (125 MHz; CDCl<sub>3</sub>) 19.9, 20.0, 20.4, 20.5, 30.8, 37.6, 46.1, 50.9, 56.0, 56.6, 109.9, 112.3, 128.8, 135.9, 150.6, 154.1, 169.5;  $m/z$ (CI) 322 (100%, M+H); Acc. mass found (M+H) 322.2376 (C<sub>19</sub>H<sub>31</sub>NO<sub>3</sub> requires (M) 322.2377).

*2-tert-Butyl-6-(dimethylamino)-N,N-diethylbenzamide 6g*. —Method B was used with amide **5g** (80 mg, 0.24 mmol) to give a residue that was purified by flash chromatography (SiO<sub>2</sub>; Petrol:EtOAc 50:50) to give the *amide 6g* (40 mg, 59%) as colourless oil; R<sub>f</sub> (70:30 Petrol:EtOAc) 0.86;  $\nu_{\max}/\text{cm}^{-1}$  2938 (C-H), 1625 (C=O);  $\delta_{\text{H}}$ (500 MHz; CDCl<sub>3</sub>) 0.92 (3H, t, *J* 7, CH<sub>3</sub>), 1.10 (3H, t, *J* 7, CH<sub>3</sub>), 1.24 (9H, s, <sup>t</sup>Bu), 2.52 (6H, s, NMe<sub>2</sub>), 2.86 (1H, m, NCH<sub>2</sub>), 2.91 (1H, m, NCH<sub>2</sub>), 3.22 (1H, m, NCH<sub>2</sub>), 3.59 (1H, m, NCH<sub>2</sub>), 6.87 (1H, d, *J* 7, ArH), 7.07-7.13 (2H, m, ArH);  $\delta_{\text{C}}$ (125 MHz; CDCl<sub>3</sub>) 12.3, 13.2, 32.1, 36.9, 38.4, 43.2, 46.2, 118.1, 123.3, 128.7,

# Supplementary Material (ESI) for Chemical Communications

# This journal is (c) The Royal Society of Chemistry 2006

133.2, 148.1, 152.3, 171.8;  $m/z$  (CI) 277 (100%, M+H); Acc. mass found (M+H) 277.2265 ( $C_{17}H_{28}N_2O$  requires (M) 277.2274).

*2-sec-Butyl-6-(dimethylamino)-N,N-diethylbenzamide 6g'*. —*s*-BuLi (0.53 ml of a 1.3M solution in hexanes, 0.69 mmol) was added dropwise to sulfoxide **5g** (80 mg, 0.24 mmol) at  $-78$  °C. After 20 minutes saturated ammonium chloride soln. (1 ml) was added and the mixture allowed to warm to room temperature. The mixture diluted with diethylether (30 ml), washed with saturated ammonium chloride solution (3 x 20 ml), dried ( $MgSO_4$ ) and concentrated under reduced pressure. The residue was purified by flash chromatography ( $SiO_2$ ; Petrol:EtOAc 80:20) to give the *amide 6g'* (35 mg, 51%) as yellow crystals, m.p.  $>260$  °C;  $R_f$  (70:30 Petrol:EtOAc) 0.65;  $\nu_{max}/cm^{-1}$  2962, 2933 (C-H), 1625 (C=O);  $\delta_H$ (500 MHz;  $CDCl_3$ ) 1:1 mixture of diastereoisomers, 0.75 (3H, t,  $J$  7,  $CH_3$ ), 0.80 (3H, t,  $J$  7,  $CH_3$ ), 0.90-1.00 (6H, m,  $NMe_2$ ), 1.05 (3H, d,  $J$  7,  $CH_3$ ), 1.00-1.19 (9H, m,  $CH_3$ ), 1.38-1.50 (2H, m,  $CH_2$ ), 1.55-1.65 (2H, m,  $CH_2$ ), 2.50-2.58 (2H, m, CHAr), 2.65 (12H, s,  $NMe_2$ ), 2.90-3.05 (4H, m,  $NCH_2$ ), 3.40-3.60 (4H, m,  $NCH_2$ ), 6.78 (2H, m, ArH), 6.85 (2H, d,  $J$  8, ArH), 7.15-7.19 (2H, m, ArH);  $\delta_C$ (75 MHz;  $CDCl_3$ ) mixture of diastereoisomers;  $m/z$  (CI) 277 (100%, M+H); Acc. mass found (M+H) 277.2279 ( $C_{17}H_{28}N_2O$  requires (M) 277.2274).

*N,N-Diisopropyl-2-(isopropylthio)naphthalene-1-carboxamide 7*. —By method A, **4d** (1.19 g, 4.70 mmol) and diisopropyldisulfide (0.97 ml, 6.10 mmol) gave a residue which was purified by flash chromatography ( $SiO_2$ ; Petrol:EtOAc 70:30) to give the *sulfide 7* (1.41 g, 92%) as white crystals, m.p.  $72-74$  °C;  $R_f$  (70:30 Petrol:EtOAc) 0.56;  $\nu_{max}/cm^{-1}$  2967, 2928 and 2867 (C-H), 1631 (C=O);  $\delta_H$ (500 MHz;  $CDCl_3$ ) 0.74 (3H, d,  $J$  7,  $CH_3$ ), 0.99 (3H, d,  $J$  7,  $CH_3$ ), 1.07-1.10 (6H, m,  $CH_3$ ), 1.49 (3H, d,  $J$  7,  $CH_3$ ), 1.54 (3H, d,  $J$  7,  $CH_3$ ), 3.27 (1H, sept,  $J$  7, NCH), 3.37-3.42 (2H, m, NCH), 7.25-7.34 (3H, m, ArH), 7.52-7.59 (3H, m, ArH);  $\delta_C$ (125 MHz;  $CDCl_3$ ) 20.6, 21.2, 21.2, 21.7, 23.4, 24.1, 39.9, 46.5, 51.7, 125.4, 126.8, 127.4, 128.2, 128.4, 128.9, 130.6, 131.2, 133.0, 140.3, 168.4;  $m/z$  (CI) 330 (100%, M+H); Acc. mass found (M+H) 330.1887 ( $C_{20}H_{27}NSO$  requires (M) 330.1886).

*N,N-Diisopropyl-2-(isopropylsulfinyl)naphthalene-1-carboxamide 8*. —The sulfide **7** (1.10 g, 3.34 mmol in 10 ml dry dichloromethane) was added dropwise to a stirred solution of ~50% mCPBA (1.15 g, 6.68 mmol) in dry dichloromethane (30 ml) at 0 °C. After 2 hours the reaction

# Supplementary Material (ESI) for Chemical Communications

# This journal is (c) The Royal Society of Chemistry 2006

was quenched with 10% aq. sodium sulfite, diluted with 30 ml dichloromethane and washed with saturated bicarbonate solution (3 x 15 ml), dried (MgSO<sub>4</sub>) and solvents evaporated under reduced pressure. The residue was purified by flash chromatography (SiO<sub>2</sub>; Petrol:EtOAc 80:20) to give the *sulfoxide* **8** (800 mg, 70%) as white crystals, m.p. 92-96 °C; R<sub>f</sub> (70:30 Petrol:EtOAc) 0.42;  $\nu_{\max}/\text{cm}^{-1}$  2971, 2933, 2871 (C-H), 1626 (C=O);  $\delta_{\text{H}}$ (500 MHz; CDCl<sub>3</sub>) 0.80 (3H, d, *J* 7, CH<sub>3</sub>), 0.95 (3H, d, *J* 7, CH<sub>3</sub>), 0.99 (3H, d, *J* 7, CH<sub>3</sub>), 1.15 (3H, d, *J* 7, CH<sub>3</sub>), 1.45 (3H, d, *J* 7, CH<sub>3</sub>), 1.53 (3H, d, *J* 7, CH<sub>3</sub>), 3.07 (1H, sept, *J* 7, CH), 3.29 (1H, sept, *J* 7, CH), 3.43 (1H, sept, *J* 7, CH), 7.38-7.40 (2H, m, ArH), 7.64 (1H, sept, *J* 7, CH), 7.72 (1H, sept, *J* 7, CH), 7.77-7.83 (2H, sept, *J* 7, CH);  $\delta_{\text{C}}$ (125 MHz; CDCl<sub>3</sub>) 13.2, 18.2, 20.5, 20.9, 21.2, 21.4, 46.9, 52.0, 54.5, 120.7, 125.6, 128.2, 128.4, 129.0, 129.4, 129.4, 134.9, 135.3, 136.3, 166.7; *m/z* (CI) 346 (100%, M+H), 245 (60%); Acc. mass found (M+H) 346.1834 (C<sub>20</sub>H<sub>27</sub>NSO<sub>2</sub> requires (*M*) 346.1835).

2-(<sup>13</sup>C-*tert*-Butylsulfinyl)-*N,N*-diisopropyl*naphthalene-1-carboxamide* <sup>13</sup>C-**5d**. —LDA (0.60 ml of a 1.8 M solution in hexanes, 1.09 mmol) was added dropwise to amide **8** (250 mg, 0.72 mmol) at -78 °C giving a reddish-brown solution. After 30 minutes <sup>13</sup>CH<sub>3</sub>I (68  $\mu$ L, 1.09 mmol) was added and the mixture was raised to room temperature giving a yellow solution. The mixture diluted with diethyl ether (30 ml), washed with saturated ammonium chloride solution (3 x 20 ml), dried (MgSO<sub>4</sub>) and concentrated under reduced pressure. The residue was purified by flash chromatography (SiO<sub>2</sub>; Petrol:EtOAc 50:50) to give the sulfoxide <sup>13</sup>C-**5d** (232 mg, 88%) as yellow crystals, m.p. 35-36 °C; R<sub>f</sub> (70:30 Petrol:EtOAc) 0.20;  $\nu_{\max}/\text{cm}^{-1}$  2973, 2934 (C-H), 1633 (C=O);  $\delta_{\text{H}}$ (500 MHz; CDCl<sub>3</sub>) 0.83 (3H, d, *J* 7, CH<sub>3</sub>), 1.16 (3H, d, *J* 7, CH<sub>3</sub>), 1.21 (3H, d, *J* 128, <sup>13</sup>CH<sub>3</sub>), 1.22 (6H, s, CH<sub>3</sub>), 1.57 (3H, d, *J* 7, CH<sub>3</sub>), 1.65 (3H, d, *J* 7, CH<sub>3</sub>), 3.33 (1H, sept, *J* 7, NCH), 3.52 (1H, sept, *J* 7, NCH), 7.49-7.53 (2H, m, ArH), 7.80-7.89 (4H, m, ArH);  $\delta_{\text{C}}$ (125 MHz; CDCl<sub>3</sub>) 20.4, 20.9, 21.0, 21.6, 23.2 (major), 46.8, 51.8, 58.5, 121.9, 126.2, 128.1, 128.7, 128.8, 129.0, 129.5, 134.3, 135.2, 137.9, 166.7; *m/z* (CI) 361 (100%, M+H); Acc. mass found (M+H) 361.2036 (<sup>13</sup>CC<sub>20</sub>H<sub>29</sub>NO<sub>2</sub>S requires (*M*) 361.2025).

1. Clayden, J.; Lai, L. W.; Helliwell, M., *Tetrahedron* **2004**, *60*, 4399.



# Supplementary Material (ESI) for Chemical Communications

# This journal is (c) The Royal Society of Chemistry 2006

2. Still, W. C.; Kahn, M.; Mitra, A., *J. Org. Chem.* **1978**, *43*, 2923.
3. Weix, D. J.; Ellman, J. A., *Org. Lett.* **2003**, *5*, 1317.
4. Lewis, J. C.; Wiedemann, S. H.; Bergman, R. G.; Ellman, J. A., *Org. Lett.* **2004**, *6*, 35.
5. Hans, J. J.; Driver, R. W.; Burke, S. D., *J. Org. Chem.* **2004**, *65*, 2114.
6. Alonso, E.; Ramon, D. J.; Yus, M., *Tetrahedron* **1998**, *54*, 13629.
7. *Tetrahedron* **1998**, *54*, 13629.
8. Deyrup, J. A.; Szabo, W. A., *J. Org. Chem.* **1975**, *40*, 2048.
9. Tsutshi, H.; Ichikawa, T.; Narasaka, K., *Bull. Chem. Soc. Jap.* **1999**, *72*, 1869.
10. Brenstrum, T J; Brimble, M. A.; Stevenson, R. J., *Tetrahedron* **1994**, *50*, 4897.
11. Bowles, P.; Clayden, J.; Helliwell, M.; McCarthy, C.; Tomkinson, M.; Westlund, N., *J. Chem. Soc. Perkin Trans. 1* **1997**, 2607.
12. Kwong, F. Y.; Lam, W. H.; Yeung, C. H.; Chan, K. S.; Chan, A. S. C., *Chem. Commun.* **2004**, 1922.
13. Hjelmencrantz, A.; Berg, U., *J. Org. Chem.* **2002**, *67*, 3585.
14. Kamitori, Y.; Hojo, M.; Masuda, R.; Izumi, T.; Tsukamoto, S., *J. Org. Chem.* **1984**, *49*, 22.
